# Supplementary material
Source: publisher figshare collection journal article supplement (https://acs.figshare.com/ndownloader/files/25491685)
Supplement: Supplementary file 1 [file 25491685]

# Production of cyanide using thermal plasma: thermodynamic analysis and experimental specific energy consumption

## Supporting information

Figure SI F1 Detailed Thermodynamic profile of C-N-H species (1:2:4), e.g. feed of nitrogen and methane

Figure SI F2: Detailed Thermodynamic profile of C-H-N species same as figure 1 but excluding condensed carbon

Figure SI F3: Process diagram

Table SI T1: Experimental data and mass balance (Nitrogen and Propane)

Table SI T2: Experimental data and mass balance (Nitrogen and Methane)

19

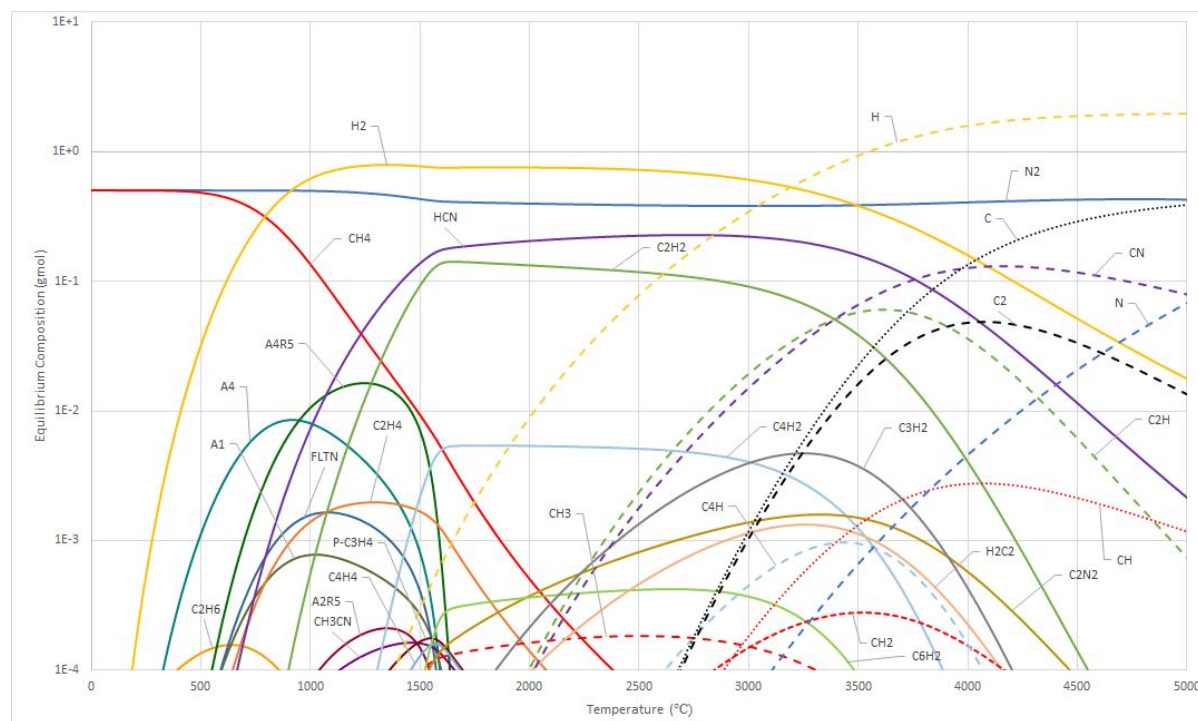

Figure SI-F1 Detailed Thermodynamic profile of C-N-H species (1:2:4), e.g. feed of nitrogen and methane

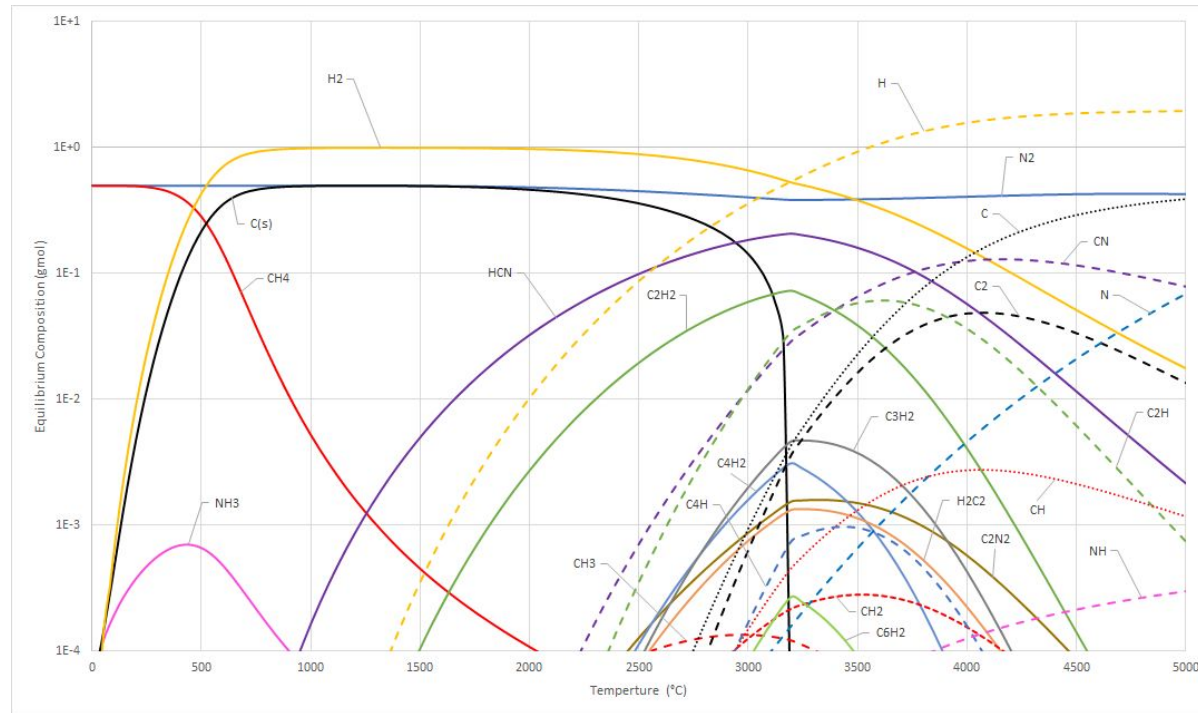

Figure SI-F2: Detailed Thermodynamic profile of C-H-N species same as figure 1 but excluding condensed carbon

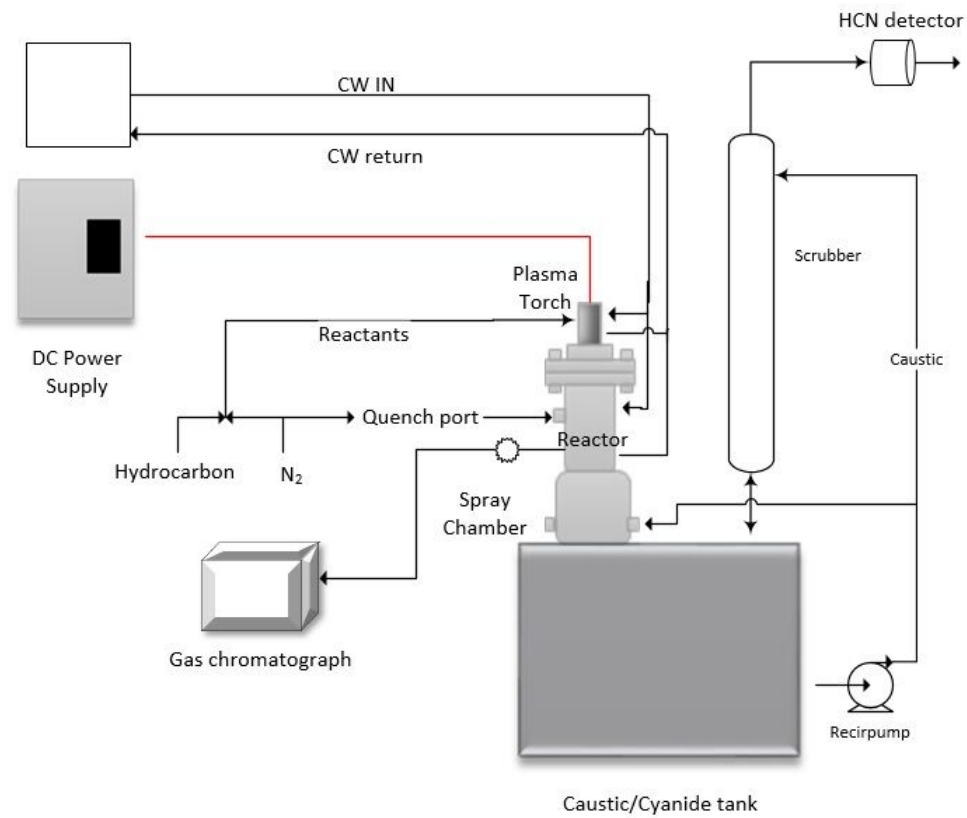

Figure SI-F3: Process flow diagram

34 Table SI-T1: Experimental parameters and mass balance – Nitrogen and Propane

| Test No | Nitrogen Flow | Propane Flow | N:C   | Nitrogen Mol % | Power | HCN yield | Cyanide conv | SEC (NaCN) | N <sub>2</sub> | C <sub>3</sub> H <sub>8</sub> | Carbon ** | Carbon to Acetylene | Carbon to Soot |
|---------|---------------|--------------|-------|----------------|-------|-----------|--------------|------------|----------------|-------------------------------|-----------|---------------------|----------------|
|         | SLPM          | SLPM         |       | %              | kW    | g/min     | %            | kw-hr/Kg   | mol/min        | mol/min                       | mol/min   |                     |                |
| 1       | 46.5          | 7.75         | 4.00  | 85.7 %         | 23    | 9.25      | 37%          | 22.8       | 1.88           | 0.31                          | 0.94      | 36%                 | 27%            |
| 2       | 51            | 6.25         | 5.44  | 89.1 %         | 23    | 9.67      | 47%          | 21.8       | 2.06           | 0.25                          | 0.76      |                     |                |
| 3       | 64            | 7            | 6.10  | 90.1 %         | 23    | 11.44     | 50%          | 18.5       | 2.58           | 0.28                          | 0.85      |                     |                |
| 4       | 64.25         | 6            | 7.14  | 91.5 %         | 23    | 13.57     | 69%          | 15.57      | 2.59           | 0.24                          | 0.73      | 19%                 | 12%            |
| 5       | 63.5          | 4            | 10.58 | 94.1 %         | 23    | 9.70      | 74%          | 21.8       | 2.56           | 0.16                          | 0.48      | 16%                 | 10%            |
| 6       | 64            | 4            | 10.67 | 94.1 %         | 23    | 9.73      | 74%          | 21.7       | 2.58           | 0.16                          | 0.48      |                     |                |
| 7       | 63.5          | 2            | 21.17 | 96.9 %         | 23    | 5.19      | 79.45 %      | 40.8       | 2.56           | 0.08                          | 0.24      | 12%                 | 9%             |
|         |               |              |       |                |       |           |              |            |                |                               |           |                     |                |
| 8       | 57.5          | 8            | 4.79  | 87.8 %         | 27    | 12.27     | 47%          | 20.2       | 2.32           | 0.32                          | 0.97      |                     |                |
| 9       | 64            | 9            | 4.74  | 87.7 %         | 27    | 13.16     | 45%          | 18.8       | 2.58           | 0.36                          | 1.09      |                     |                |
|         |               |              |       |                |       |           |              |            |                |                               |           |                     |                |
| 11      | 72            | 8.9          | 5.39  | 89.0 %         | 27    | 15.30     | 53%          | 16.2       | 2.91           | 0.36                          | 1.08      |                     |                |

|    |      |     |      |        |      |       |       |       |      |      |      |     |     |
|----|------|-----|------|--------|------|-------|-------|-------|------|------|------|-----|-----|
| 12 | 72   | 9   | 5.33 | 88.9 % | 27   | 16.06 | 55%   | 15.4  | 2.91 | 0.36 | 1.09 |     |     |
| 13 | 72   | 10  | 4.8  | 87.8   | 27   | 12.40 | 37.93 | 19.99 | 2.91 | 0.41 | 1.25 |     |     |
|    |      |     |      |        |      |       |       |       |      |      |      |     |     |
| 14 | 32   | 1   | 21.3 | 97.0 % | 14.5 | 2.42  | 74%   | 55.0  | 1.29 | 0.04 | 0.12 | 15% | 11% |
| 15 | 32   | 2   | 10.6 | 94.1 % | 14.5 | 4.1   | 63%   | 32.5  | 1.29 | 0.08 | 0.24 |     |     |
| 16 | 32   | 3   | 7.1  | 91.4 % | 14.5 | 7.17  | 73%   | 18.57 | 1.29 | 0.12 | 0.36 | 19% | 8%  |
| 17 | 33.5 | 4.2 | 5.3  | 88.9 % | 14.5 | 6.62  | 48%   | 20.1  | 1.35 | 0.17 | 0.51 | 35% | 17% |
| 18 | 32   | 4.2 | 5.1  | 88.4 % | 14.5 | 6.57  | 48%   | 20.3  | 1.29 | 0.17 | 0.51 | 34% | 18% |

\*\* The carbon (soot) production was not measured experimentally. It is determined by the mass balance after deducting moles of acetylene and cyanide produced from total carbon supplied. Almost 100% propane was consumed since no major peak was observed in the product analysis. Trace amounts (<10ppm) of benzene was detected. A few small peaks of long chain compounds were found but not characterised.

| Test No | Nitrogen Flow | Propane Flow | N:C  | Nitrogen Mol % | Power     | HCN yield    | Cyanide conv | SEC (NaCN)      | N2             | CH4            | Carbon **      |
|---------|---------------|--------------|------|----------------|-----------|--------------|--------------|-----------------|----------------|----------------|----------------|
|         |               |              |      |                |           |              |              |                 |                |                |                |
|         | <b>SLPM</b>   | <b>SLPM</b>  |      | <b>%</b>       | <b>kW</b> | <b>g/min</b> | <b>%</b>     | <b>kw-hr/Kg</b> | <b>mol/min</b> | <b>mol/min</b> | <b>mol/min</b> |
| M1      | 64            | 19           | 6.74 | 77.1 %         | 25        | 12.2         | 59.5 %       | 18.7            | 2.58           | 0.77           | 0.77           |
| M2      | 64            | 17           | 7.53 | 79 %           | 25        | 12.07        | 65 %         | 19              | 2.58           | 0.69           | 0.69           |
| M3      | 64            | 17           | 7.53 | 79 %           | 25        | 12.1         | 65 %         | 19              | 2.58           | 0.69           | 0.69           |
| M4      | 64.75         | 13           | 9.96 | 83 %           | 25        | 11.57        | 82 %         | 19.75           | 2.61           | 0.52           | 0.52           |
| M5      | 65            | 14           | 9.15 | 82%            | 26        | 12.95        | 85%          | 19.13           | 2.85           | 0.62           | 0.62           |
| M6      | 64            | 10           | 13   | 87%            | 25        | 9.21         | 85%          | 24.92           | 2.90           | 0.44           | 0.44           |
| M7      | 64            | 7.5          | 17   | 90%            | 25        | 7.15         | 87%          | 32.12           | 2.90           | 0.33           | 0.33           |
| M8      | 64            | 7.5          | 17   | 90%            | 25        | 6.82         | 85%          | 34.96           | 2.85           | 0.33           | 0.33           |
| M9      | 64            | 5            | 25.5 | 93%            | 25        | 5.04         | 92%          | 45.62           | 2.85           | 0.22           | 0.22           |

45

46 \*\* The carbon (soot) production was not measured experimentally. It is determined by the mass balance after deducting moles of acetylene and cyanide  
47 produced from total carbon supplied. 100% methane was consumed since no major peak was observed in the product analysis.

48
